# Supplementary material
Source: ML conference proceedings conference paper supplement (https://proceedings.mlr.press/v130/kerdreux21a.html)
Supplement: Supplementary file 1 [file kerdreux21a-supp.pdf]

## A Offline Proofs

### A.1 Proof of the Scaling Inequalities

*Proof of Lemma 2.4.* By definition of local uniform convexity between  $x^*$  and  $x$ , we have that for any  $z \in \mathbb{R}^d$  of unit norm  $(x^* + x)/2 + \alpha/4\|x^* - x\|^q z \in \mathcal{C}$ . Then, by optimality of  $x^*$ , i.e.  $x^* \in \operatorname{argmax}_{v \in \mathcal{C}} \langle -\nabla f(x^*), v \rangle$ , we have  $\langle -\nabla f(x^*), x^* \rangle \geq \langle -\nabla f(x^*), (x^* + x)/2 + \alpha/4\|x^* - x\|^q z \rangle$ . Choosing the best  $z$  implies

$$\langle -\nabla f(x^*), x^* - x \rangle \geq \alpha/2\|x^* - x\|^q \|\nabla f(x^*)\|_*.$$

■

*Proof of Corollary 2.7.* Here, because  $-\nabla f(x^*) \in N_\Gamma(x^*)$ , we have that  $x^* \in \operatorname{argmax}_{v \in \Gamma} \langle -\nabla f(x^*), v \rangle$ . Also, for  $x \in \mathcal{C} \subset \Gamma$ , by  $(\alpha, q)$ -uniform convexity of  $\Gamma$ , we also have that for any  $z \in \mathbb{R}^d$  of unit norm that  $(x^* + x)/2 + \alpha/4\|x^* - x\|^q z \in \Gamma$ . Then, by optimality of  $x^*$ , we have  $\langle -\nabla f(x^*), x^* \rangle \geq \langle -\nabla f(x^*), (x^* + x)/2 + \alpha/4\|x^* - x\|^q z \rangle$ . Choosing the best  $z$  implies (for any  $x \in \mathcal{C}$ )  $\langle -\nabla f(x^*), x^* - x \rangle \geq \alpha/2\|x^* - x\|^q \|\nabla f(x^*)\|_*$ . ■

### A.2 Recursive Lemma

The proofs of Theorems 2.2, 2.5, and 2.9 involve finding explicit bounds for sequences  $(h_t)$  satisfying recursive inequalities of the form,

$$h_{t+1} \leq h_t \cdot \max\{1/2, 1 - Ch_t^\eta\}. \quad (5)$$

with  $\eta < 1$ . An explicit solution with  $\eta = 1/2$  is given in [Garber and Hazan, 2015] and corresponds to  $h_t = \mathcal{O}(1/T^2)$ , while for  $\eta = 1$  we recover the classical sublinear Frank-Wolfe regime of  $\mathcal{O}(1/T)$ . For a  $\eta \in ]0, 1]$ , we have  $\mathcal{O}(1/T^{1/\eta})$  (see for instance [Temlyakov, 2011] or [Nguyen and Petrova, 2017, Lemma 4.2.]), which can be guessed via  $h(t) = (C\eta)^{1/\eta} t^{-1/\eta}$  the solution of the differential equation  $h'(t) = -Ch(t)^{\eta+1}$  for  $t > 0$ . A quantitative statement is, for instance, given in [Xu and Yang, 2018, proof of Theorem 1.] that we reproduce here.

**Lemma A.1** (Recurrence and sub-linear rates). *Consider a sequence  $(h_t)_{t \in \mathbb{N}}$  of non-negative numbers satisfying (5) with  $0 < \eta \leq 1$ , then  $h_T = \mathcal{O}(1/T^{1/\eta})$ . More precisely for all  $t \geq 0$ ,*

$$h_t \leq \frac{M}{(t+k)^{1/\eta}}$$

with  $k \triangleq (2 - 2^\eta)/(2^\eta - 1)$  and  $M \triangleq \max\{h_0 k^{1/\eta}, 2/((\eta - (1 - \eta)(2^\eta - 1))C)^{1/\eta}\}$ .

### A.3 Convergence Rates with Local Scaling Inequality

The local scaling inequality expresses a property between  $x^*$  and any  $x \in \mathcal{C}$ . In Lemma A.2, we show that albeit we only have access to a local scaling inequality, it is still possible to control the variation of the distance of the iterate to its Frank-Wolfe vertex  $\|x_t - v_t\|$  in terms of a power of the primal gap, see beginning of Section 2 for a qualitative explanation.

**Lemma A.2.** *Consider  $f$  a  $L$ -smooth convex function and a compact convex set  $\mathcal{C}$ . Assume  $\inf_{x \in \mathcal{C}} \|\nabla f(x)\|_* > c > 0$  and write  $x^* \in \partial \mathcal{C}$  the solution of (OPT). Assume that  $\mathcal{C}$  satisfies a local scaling inequality at  $x^*$  for problem (OPT) with  $\alpha > 0$  and  $q \geq 2$ , i.e. for all  $x \in \mathcal{C}$*

$$\langle -\nabla f(x^*), x^* - x \rangle \geq \alpha/2 \|\nabla f(x^*)\|_* \cdot \|x^* - x\|^q. \quad (6)$$

Write  $v_t \triangleq \operatorname{argmax}_{v \in \mathcal{C}} \langle -\nabla f(x_t), v \rangle$  the Frank-Wolfe vertex. Assume that  $h_t = f(x_t) - f(x^*) \leq 1$  (a simple burn-in phase). Then, we have

$$\|x_t - v_t\| \leq H h_t^{1/(q(q-1))}, \quad (7)$$

with  $H \triangleq 2 \cdot \max\left\{\left(\frac{2L}{c\alpha}\right)^{1/(q-1)}, \left(\frac{2}{c\alpha}\right)^{1/(q(q-1))}, \left(\frac{2}{c\alpha}\right)^{1/q}\right\}$ .

*Proof.* We apply the local scaling inequality (6) with  $x = v_t$  and  $x = x_t$ . We obtain two important inequalities: one (7) that upper bounds  $\|x_t - v_t\|$  in terms of  $f(x_t) - f(x^*)$  and another (8) that upper bounds  $\|v_t - x^*\|$  in terms of  $\|x^* - x_t\|$ , where  $v_t$  is the Frank-Wolfe vertex related to iterate  $x_t$ . These two inequalities rely on convexity,  $L$ -smoothness and (6), but do not rely on strong convexity of the function  $f$ .

By optimality of the Frank-Wolfe vertex  $v_t$ , we have  $\nabla f(x_t)^T v_t \leq \nabla f(x_t)^T x^*$ . Hence, combining that with the local scaling inequality evaluated at  $v_t$  and Cauchy-Schwartz, we get

$$\begin{aligned} \|\nabla f(x^*) - \nabla f(x_t)\| \|v_t - x^*\| &\geq \langle \nabla f(x^*) - \nabla f(x_t), v_t - x^* \rangle + \underbrace{\langle \nabla f(x_t), v_t - x^* \rangle}_{\leq 0} \\ &\geq \langle \nabla f(x^*), v_t - x^* \rangle \geq c\alpha/2 \|v_t - x^*\|^q. \end{aligned}$$

Then,  $L$ -smoothness applied to the left hand side leaves us with

$$\|x_t - x^*\| \geq \frac{c\alpha}{2L} \|v_t - x^*\|^{q-1}. \quad (8)$$

Then, the triangular inequality gives

$$\begin{aligned} \|x_t - v_t\| &\leq \|v_t - x^*\| + \|x^* - x_t\| \\ \|x_t - v_t\| &\leq \left(\frac{2L}{c\alpha}\right)^{1/(q-1)} \|x_t - x^*\|^{1/(q-1)} + \|x^* - x_t\|. \end{aligned}$$

Finally applying (6) with  $x = x_t$  with  $\inf_{x \in \mathcal{C}} \|\nabla f(x)\|_* > c > 0$  and using the convexity of  $f$  (i.e.,  $f(x_t) \geq f(x^*) + \langle \nabla f(x^*); x_t - x^* \rangle$ ), we have  $\|x_t - x^*\| \leq \left(\frac{2}{c\alpha}\right)^{1/q} h_t^{1/q}$  which leads to

$$\|x_t - v_t\| \leq \left(\frac{2L}{c\alpha}\right)^{1/(q-1)} \left(\frac{2}{c\alpha}\right)^{1/(q(q-1))} h_t^{1/(q(q-1))} + \left(\frac{2}{c\alpha}\right)^{1/q} h_t^{1/q}.$$

We can simplify this previous expression, and we assumed without loss of generality (i.e. up to a burning-phase) that  $h_t \leq 1$ , which implies for  $q \geq 2$  that  $h_t^{1/(q(q-1))} \geq h_t^{1/q}$ . With  $H \triangleq 2 \cdot \max\left\{\left(\frac{2L}{c\alpha}\right)^{1/(q-1)} \left(\frac{2}{c\alpha}\right)^{1/(q(q-1))}, \left(\frac{2}{c\alpha}\right)^{1/q}\right\}$ , we then have

$$\|x_t - v_t\| \leq H h_t^{1/(q(q-1))}.$$

■

We now give the proof of Theorem 2.5. Recall that this theorem gives the convergence rates of the Frank-Wolfe algorithm when the set  $\mathcal{C}$  satisfies a local scaling inequality (that is, for instance, with Lemma 2.4 a consequence of local uniform convexity of the constraint set  $\mathcal{C}$ ). It does not require uniform convexity of the function  $f$ , but assumes that  $f$  is a convex  $L$ -smooth function with  $\inf_{x \in \mathcal{C}} \|\nabla f(x)\|_* > 0$ .

**Theorem 2.5'.** *Consider  $f$  a  $L$ -smooth convex function and a compact convex set  $\mathcal{C}$ . Assume  $\|\nabla f(x)\|_* > c > 0$  for all  $x \in \mathcal{C}$  and write  $x^* \in \partial\mathcal{C}$  a solution of (OPT). Further, assume that  $\mathcal{C}$  satisfies a local scaling inequality at  $x^*$  with the  $(\alpha, q)$  parameters. Then the iterates of the Frank-Wolfe algorithm, with short step satisfy*

$$\begin{cases} f(x_T) - f(x^*) \leq M/(T+k)^{\frac{1}{1-2/(q-1)}} & \text{when } q > 2 \\ f(x_T) - f(x^*) \leq (1-\rho)^T h_0 & \text{when } q = 2, \end{cases} \quad (9)$$

with  $\rho = \max\{\frac{1}{2}, 1 - c\alpha/L\}$ ,  $k \triangleq (2 - 2^\eta)/(2^\eta - 1)$  and  $M \triangleq \max\{h_0 k^{1/\eta}, 2/((\eta - (1 - \eta)(2^\eta - 1))C)^{1/\eta}\}$ , where  $\eta \triangleq 1 - 2/(q(q-1))$  and  $C \triangleq 1/(2LH^2)$ . Note that  $H$  depends only on  $C, \alpha, L$  and  $q$  (see Lemma A.2).

*Proof of Theorem 2.5.* With Lemma A.2, which satisfies the assumption of Theorem 2.5, we have

$$\|x_t - v_t\| \leq H h_t^{1/(q(q-1))},$$

with  $H \triangleq 2 \cdot \max\left\{\left(\frac{2L}{c\alpha}\right)^{1/(q-1)}\left(\frac{2}{c\alpha}\right)^{1/(q(q-1))}, \left(\frac{2}{c\alpha}\right)^{1/q}\right\}$ . We plug this last expression in the classical descent guarantee given by  $L$ -smoothness

$$\begin{aligned} h_{t+1} &\leq (1-\gamma)h_t + \gamma^2 \frac{L}{2} \|v_t - x_t\|^2 \\ h_{t+1} &\leq (1-\gamma)h_t + \gamma^2 \frac{L}{2} H^2 h_t^{2/(q(q-1))}. \end{aligned}$$

The optimal decrease  $\gamma \in [0, 1]$  is  $\gamma^* = \min\left\{\frac{h_t^{1-2/(q(q-1))}}{LH^2}, 1\right\}$ . When  $\gamma^* = 1$ , or equivalently  $h_t \geq (LH^2)^{2/(q(q-1))}$ , we have  $h_{t+1} \leq h_t/2$ . In other words, for the very first iterations, there is a brief linear convergence regime. Otherwise, when  $\gamma^* \leq 1$ , we have

$$h_{t+1} \leq h_t \left(1 - \frac{1}{2LH^2} h_t^{1-2/(q(q-1))}\right). \quad (10)$$

When  $q = 2$ , this corresponds to the strongly convex case and we recover the classical linear-convergence regime. We conclude using Lemma A.1 that the rate is  $\mathcal{O}\left(1/T^{1/(1-2/(q(q-1)))}\right)$ . ■

#### A.4 Proof without restriction on the location of the optimum.

We regroup here the proofs of the lemma and the theorem contained in Section 2.4.

*Proof of Lemma 2.8.* By Lemma 2.1 we have  $g(x_t) = \langle -\nabla f(x_t); v_t - x_t \rangle \geq \alpha/2 \|x_t - v_t\|^q \|\nabla f(x_t)\|_*$ . Then, by combining the convexity of  $f$ , Cauchy-Schwartz and  $(\mu, \theta)$ -Hölderian Error Bound, we have

$$f(x_t) - f(x^*) \leq \langle \nabla f(x_t), x - x^* \rangle \leq \|\nabla f(x_t)\|_* \cdot \|x_t - x^*\| \leq \mu \|\nabla f(x_t)\|_* \cdot (f(x_t) - f(x^*))^\theta,$$

so that  $(f(x) - f(x^*))^{1-\theta} \leq \mu \|\nabla f(x)\|_*$  and finally  $g(x_t) \geq \alpha/(2\mu) \|x_t - v_t\|^q h_t^{1-\theta}$ . ■

*Proof of Theorem 2.9.* From the proof of Theorem 2.2,  $L$ -smoothness and the step size decision we have

$$h(x_{t+1}) \leq h(x_t) - \frac{g(x_t)}{2} \cdot \min\left\{1; \frac{g(x_t)}{L\|x_t - v_t\|^2}\right\}.$$

From Lemma 2.8, we have  $g(x_t) \geq \alpha/(2\mu) \|x_t - v_t\|^q h_t^{1-\theta}$ . Hence, we can rewrite

$$\frac{g(x_t)}{\|x_t - v_t\|^2} = \left(\frac{g(x_t)^{q/2-1} g(x_t)}{\|x_t - v_t\|^q}\right)^{2/q} \geq \left(\alpha/(2\mu)\right)^{2/q} g(x_t)^{1-2/q} h_t^{(1-\theta)2/q}.$$

And because  $g(x_t) \geq h_t$ , we have

$$\frac{g(x_t)}{\|x_t - v_t\|^2} \geq \left(\alpha/(2\mu)\right)^{2/q} h_t^{1-2\theta/q}.$$

We finally end up with the following recursion

$$h(x_{t+1}) \leq h(x_t) \cdot \max\left\{\frac{1}{2}; 1 - \left(\alpha/(2\mu)\right)^{2/q} h_t^{1-2\theta/q}/L\right\},$$

and we conclude with Lemma A.1. ■

## B Proofs in Online Optimization

The following is the generalization of [Huang et al., 2017, (6)] when the set is uniformly convex (see Definition 1.1). Note that in our version  $\mathcal{C}$  can be uniformly convex with respect to any norm.

**Proposition B.1.** Assume  $\mathcal{C} \subset \mathbb{R}^d$  is a  $(\alpha, q)$ -uniformly convex set with respect to  $\|\cdot\|$ , with  $\alpha > 0$  and  $q \geq 2$ . Consider the non-zero vectors  $\phi_1, \phi_2 \in \mathbb{R}^d$  and  $v_{\phi_1} \in \operatorname{argmax}_{v \in \mathcal{C}} \langle \phi_1, v \rangle$  and  $v_{\phi_2} \in \operatorname{argmax}_{v \in \mathcal{C}} \langle \phi_2, v \rangle$ . Then

$$\langle v_{\phi_1} - v_{\phi_2}, \phi_1 \rangle \leq \left(\frac{1}{\alpha}\right)^{1/(q-1)} \frac{\|\phi_1 - \phi_2\|_*^{1+1/(q-1)}}{(\max\{\|\phi_1\|_*, \|\phi_2\|_*\})^{1/(q-1)}}, \quad (11)$$

where  $\|\cdot\|_*$  is the dual norm to  $\|\cdot\|$ .

*Proof.* By definition of uniform convexity, for any  $z$  of unit norm,  $v_\gamma(z) \in \mathcal{C}$  where

$$v_\gamma(z) \triangleq \gamma v_{\phi_1} + (1-\gamma)v_{\phi_2} + \gamma(1-\gamma)\alpha\|v_{\phi_1} - v_{\phi_2}\|^q z.$$

By optimality of  $v_{\phi_1}$  and  $v_{\phi_2}$ , we have  $\langle v_\gamma(z), \phi_1 \rangle \leq \langle v_1, \phi_1 \rangle$  and  $\langle v_\gamma(z), \phi_2 \rangle \leq \langle v_2, \phi_2 \rangle$ , so that

$$\langle v_\gamma(z), \gamma\phi_1 + (1-\gamma)\phi_2 \rangle \leq \gamma\langle v_1, \phi_1 \rangle + (1-\gamma)\langle v_2, \phi_2 \rangle.$$

Write  $\phi_\gamma = \gamma\phi_1 + (1-\gamma)\phi_2$ . Then, when developing the left hand side, we get

$$\gamma(1-\gamma)\alpha\|v_{\phi_1} - v_{\phi_2}\|^q \langle z, \phi_\gamma \rangle \leq \gamma(1-\gamma)\langle v_{\phi_1} - v_{\phi_2}, \phi_1 - \phi_2 \rangle$$

Choosing the best  $z$  of unit norm we get

$$\alpha\|v_{\phi_1} - v_{\phi_2}\|^q \|\phi_\gamma\|_* \leq \langle v_{\phi_1} - v_{\phi_2}, \phi_1 - \phi_2 \rangle$$

and for  $\gamma = 0$  and  $\gamma = 1$  and via generalized Cauchy-Schwartz we get

$$\alpha\|v_{\phi_1} - v_{\phi_2}\|^q \cdot \max\{\|\phi_1\|_*, \|\phi_2\|_*\} \leq \|v_{\phi_1} - v_{\phi_2}\| \cdot \|\phi_1 - \phi_2\|_*,$$

Hence

$$\|v_{\phi_1} - v_{\phi_2}\| \leq \left(\frac{1}{\alpha}\right)^{1/(q-1)} \frac{\|\phi_1 - \phi_2\|_*^{1/(q-1)}}{(\max\{\|\phi_1\|_*, \|\phi_2\|_*\})^{1/(q-1)}}.$$

Then, since  $\langle v_{\phi_2} - v_{\phi_1}, \phi_2 \rangle \geq 0$  by optimality of  $v_{\phi_2}$ , we have

$$\langle v_{\phi_1} - v_{\phi_2}, \phi_1 \rangle \leq \|v_{\phi_1} - v_{\phi_2}\| \cdot \|\phi_1 - \phi_2\|_* \leq \left(\frac{1}{\alpha}\right)^{1/(q-1)} \frac{\|\phi_1 - \phi_2\|_*^{1+1/(q-1)}}{(\max\{\|\phi_1\|_*, \|\phi_2\|_*\})^{1/(q-1)}},$$

and we finally obtain (11). ■

We now provide a proof of Theorem 3.1.

**Theorem 3.1'.** Let  $\mathcal{C}$  be a compact and  $(\alpha, q)$ -uniformly convex set with respect to  $\|\cdot\|$ . Assume that  $L_T = \min_{1 \leq t \leq T} \|\frac{1}{t} \sum_{\tau=1}^t c_\tau\|_* > 0$ . Then the regret  $R_T$  of FTL (4) for online linear optimization satisfies

$$\begin{cases} R_T \leq 2M \left(\frac{2M}{\alpha L_T}\right)^{1/(q-1)} \left(\frac{q-1}{q-2}\right) T^{1-1/(q-1)} & \text{when } q > 2 \\ R_T \leq \frac{4M^2}{\alpha L_T} (1 + \log(T)) & \text{when } q = 2, \end{cases} \quad (12)$$

where  $M = \sup_{c \in \mathcal{W}} \|c\|_*$ , with the losses  $l_t(x) = \langle c_t, x \rangle$  and  $(c_t)$  belong to the bounded set  $\mathcal{W}$ .

*Proof of Theorem 3.1.* The proof follows exactly that of [Huang et al., 2017, Theorem 5]. Write  $M = \sup_{c \in \mathcal{W}} \|c\|_*$ ,  $F_t(x) = \frac{1}{t} \sum_{\tau=1}^t \langle c_\tau, x \rangle$  and short cut  $\nabla F_t \triangleq \frac{1}{t} \sum_{\tau=1}^t c_\tau$  the gradient of the linear function  $F_t(x)$ . Recall that with FTL,  $x_t$  is defined as

$$x_t \in \operatorname{argmin}_{x \in \mathcal{C}} \left\langle \sum_{\tau=1}^{t-1} c_\tau, x \right\rangle.$$

As in [Huang et al., 2017, Theorem 5] we have

$$\|\nabla F_t - \nabla F_{t-1}\|_* \leq \frac{2M}{t}.$$

Using [Huang et al., 2017, Proposition 2] and Proposition B.1 we get the following upper bound on the regret

$$R_T = \sum_{t=1}^T t \langle x_{t+1} - x_t, \nabla F_t \rangle \leq \left(\frac{1}{\alpha}\right)^{1/(q-1)} \sum_{t=1}^T t \frac{\|\nabla F_t - \nabla F_{t-1}\|_*^{1+1/(q-1)}}{(\max\{\|\nabla F_t\|_*, \|\nabla F_{t-1}\|_*\})^{1/(q-1)}}.$$

Hence, with  $L_T = \min_{1 \leq t \leq T} \|\nabla F_t\|_* > 0$  and  $\|\nabla F_t - \nabla F_{t-1}\|_* \leq (2M)/t$ , we have

$$R_T \leq 2M \left(\frac{2M}{\alpha L_T}\right)^{1/(q-1)} \sum_{t=1}^T t^{-1/(q-1)}.$$

Then we have for  $q > 2$

$$\sum_{t=1}^T t^{-1/(q-1)} = 1 + \sum_{t=2}^T t^{-1/(q-1)} \leq 1 + \int_{x=1}^{T-1} x^{-1/(q-1)} dx = 1 + \left[ \frac{t^{1-1/(q-1)}}{1-1/(q-1)} \right]_1^{T-1},$$

so that finally

$$R_T \leq 2M \left(\frac{2M}{\alpha L_T}\right)^{1/(q-1)} \left(\frac{q-1}{q-2}\right) T^{1-1/(q-1)}.$$

■

## C Uniform Convexity

### C.1 Uniformly Convex Spaces

*Proof of Lemma 4.2.* The argument is similar to that in [Molinaro, 2020, Appendix A], we repeat it for completeness. Assume  $(\mathbb{X}, \|\cdot\|)$  is uniformly convex with modulus of convexity  $\delta(\cdot)$ . Let us write  $\mathcal{C} \triangleq B_{\|\cdot\|}(1)$ . Then for any  $(x, y, z) \in \mathcal{C}$ , we have by definition  $1 - \frac{\|x+y\|}{2} \geq \delta(\|x-y\|)$  and then

$$\left\| \frac{x+y}{2} + \delta(\|x-y\|)z \right\| \leq \left\| \frac{x+y}{2} \right\| + \delta(\|x-y\|) \leq 1.$$

Hence,  $\frac{x+y}{2} + \delta(\|x-y\|)z \in \mathcal{C}$ . Without loss of generality, consider  $\eta \in ]0; 1/2]$ . We need to show that  $\eta x + (1-\eta)y + \delta(\|x-y\|)z \in \mathcal{C}$  for any  $z$  with norm lesser than 1. First, note that  $\eta x + (1-\eta)y = (1-2\eta)y + (2\eta)(x+y)/2$ . Note also that because  $1-2\eta \in [0, 1]$ , we have for any  $z$  of norm lesser than 1

$$(1-2\eta)x + (2\eta)[(x+y)/2 + \delta(\|x-y\|)z] \in \mathcal{C}.$$

Hence, for any  $z$  of norm lesser than 1, we have

$$\eta x + (1-\eta)y + 2\eta\delta(\|x-y\|)z \in \mathcal{C}.$$

In particular, choosing  $z' = (1-\eta)z$  gives that for any  $z$  of norm less than 1

$$\eta x + (1-\eta)y + 2\eta(1-\eta)\delta(\|x-y\|)z \in \mathcal{C},$$

which proves that  $\mathcal{C}$  is  $\delta(\cdot)$ -uniformly convex with respect to  $\|\cdot\|$ .

Let us now assume that  $B_{\|\cdot\|}(1)$  is  $(\alpha, q)$ -uniformly convex w.r.t.  $\|\cdot\|$ . Let us show that  $B_{\|\cdot\|}(r)$  is  $(\alpha/r^{q-1}, q)$ -uniformly convex. Consider  $(x, y) \in B_{\|\cdot\|}(r)$  and  $z$  with  $\|z\| \leq 1$ , we have (with  $x' = x/r$  and  $y' = y/r$ )

$$\begin{aligned} I &\triangleq \left\| \eta x + (1-\eta)y + \eta(1-\eta)\alpha r^{-(q-1)}\|x-y\|^q z \right\| \\ &= r \left\| \eta x' + (1-\eta)y' + \eta(1-\eta)\alpha \|x'-y'\|^q z \right\| \leq r. \end{aligned}$$

■

## C.2 Uniformly Convex Functions

Uniform convexity is also a property of convex functions and defined as follows.

**Definition C.1.** A differentiable function  $f$  is  $(\mu, r)$ -uniformly convex on a convex set  $\mathcal{C}$  w.r.t.  $\|\cdot\|$  if there exists  $r \geq 2$  and  $\mu > 0$  such that for all  $(x, y) \in \mathcal{C}$

$$f(y) \geq f(x) + \langle \nabla f(x), y - x \rangle + \frac{\mu}{2} \|x - y\|^r.$$

We now state the equivalent of [Journée et al., 2010, Theorem 12] for the level sets of uniformly convex functions. This was already used in [Garber and Hazan, 2015] in the case of strongly-convex sets.

**Lemma C.2.** Let  $f : \mathbb{R}^d \rightarrow \mathbb{R}^+$  be a non-negative,  $L$ -smooth and  $(\mu, r)$ -uniformly convex function on  $\mathbb{R}^d$  w.r.t.  $\|\cdot\|_2$ , with  $r \geq 2$ . Then for any  $w > 0$ , the level set

$$\mathcal{L}_w = \left\{ x \mid f(x) \leq w \right\},$$

is  $(\alpha, r)$ -uniformly convex w.r.t. with  $\alpha = \frac{\mu}{2^{r-1}\sqrt{2wL}}$ .

*Proof.* The proof follows exactly that of [Journée et al., 2010, Theorem 12], replacing  $\|x - y\|^2$  with  $\|x - y\|^r$ . We state it for the sake of completeness. Consider  $w_0 > 0$ ,  $(x, y) \in \mathcal{L}_w$  and  $\gamma \in [0, 1]$ . We denote  $z = \gamma x + (1 - \gamma)y$ . For  $u \in \mathbb{R}^d$ , by  $L$ -smoothness applied at  $z$  and at  $x^*$  (the unconstrained optimum of  $f$ ), we have

$$\begin{aligned} f(z + u) &\leq f(z) + \langle \nabla f(z), u \rangle + \frac{L}{2} \|u\|_2^2 \\ &\leq f(z) + \|\nabla f(z)\|_2 \cdot \|u\|_2 + \frac{L}{2} \|u\|_2^2 \\ &\leq f(z) + \sqrt{2Lf(z)} \|u\|_2 + \frac{L}{2} \|u\|_2^2 = \left( \sqrt{f(z)} + \sqrt{\frac{L}{2}} \|u\|_2 \right)^2. \end{aligned}$$

Note that  $(\mu, r)$ -uniform convexity of  $f$  w.r.t.  $\|\cdot\|_2$  implies that (see, e.g., [Kerdreux et al., 2021, Definition 3.2.])

$$f(z) \leq \gamma f(x) + (1 - \gamma)f(y) - \frac{\mu}{2^{r-1}} \gamma(1 - \gamma) \|x - y\|^r.$$

In particular then, because  $x, y \in \mathcal{L}_w$ , we have  $f(z) \leq w - \frac{\mu}{2^{r-1}} \gamma(1 - \gamma) \|x - y\|^r$  so that

$$f(z + u) \leq \left( \sqrt{w - \frac{\mu}{2^{r-1}} \gamma(1 - \gamma) \|x - y\|^r} + \sqrt{\frac{L}{2}} \|u\| \right)^2. \quad (13)$$

Then, with the concavity of the square-root, we get

$$f(z + u) \leq \left( \sqrt{w} - \frac{\mu}{2^r \sqrt{w}} \gamma(1 - \gamma) \|x - y\|^r + \sqrt{\frac{L}{2}} \|u\| \right)^2. \quad (14)$$

Hence for any  $u$  such that

$$\|u\| = \frac{\mu}{2^{r-1}\sqrt{2wL}} \gamma(1 - \gamma) \|x - y\|^r,$$

we have  $z + u \in \mathcal{L}_w$ . Hence  $\mathcal{L}_w$  is a  $(\frac{\mu}{2^{r-1}\sqrt{2wL}}, r)$ -uniformly convex set. ■

Lemma C.2 restrictively requires smoothness of the uniformly convex function  $f$ . Hence we provide the analogous of [Garber and Hazan, 2015, Lemma 3].

**Lemma C.3.** Consider a finite dimensional normed vector space  $(\mathbb{X}, \|\cdot\|)$ . Assume  $f(x) = \|x\|^2$  is  $(\mu, s)$ -uniformly convex function (with  $r \geq 2$ ) with respect to  $\|\cdot\|$ . Then the norm balls  $B_{\|\cdot\|}(r) = \{x \in \mathbb{X} \mid \|x\| \leq r\}$  are  $(\frac{\mu}{2^{r-1}}, s)$ -uniformly convex.

*Proof.* The proof follows exactly that of [Garber and Hazan, 2015, Lemma 3] which itself follows that of [Journée et al., 2010, Theorem 12], where operations involving  $L$ -smoothness are replaced by an application of the triangular inequality.

Let's consider  $s \geq 2$ ,  $(x, y) \in B_{\|\cdot\|}(r)$  and  $\gamma \in [0, 1]$ . We denote  $z = \gamma x + (1 - \gamma)y$ . For  $u \in \mathbb{X}$ , applying successively the triangular inequality and with the  $(\mu, s)$ -uniform convexity of  $f(x) = \|x\|^2$ , we get

$$\begin{aligned} f(z + u) = \|z + u\|^2 &\leq (\|z\| + \|u\|)^2 = (\sqrt{f(z)} + \|u\|)^2 \\ &\leq \left( \sqrt{\gamma f(x) + (1 - \gamma)f(y) - \frac{\mu}{2^{r-1}}\gamma(1 - \gamma)\|x - y\|^s} + \|u\| \right)^2 \\ &\leq \left( \sqrt{r^2 - \frac{\mu}{2^{r-1}}\gamma(1 - \gamma)\|x - y\|^s} + \|u\| \right)^2. \end{aligned}$$

We then use concavity of the square root as before to get

$$\|z + u\|^2 \leq \left( r - \frac{\mu}{2^{r-1}r}\gamma(1 - \gamma)\|x - y\|^s + \|u\| \right)^2.$$

In particular, for  $u \in \mathbb{X}$  such that  $\|u\| = \frac{\mu}{2^{r-1}r}\gamma(1 - \gamma)\|x - y\|^s$ , we have  $z + u \in B_{\|\cdot\|}(r)$ . Hence  $B_{\|\cdot\|}(r)$  is  $(\frac{\mu}{2^{r-1}r}, s)$ - uniformly convex with respect to  $\|\cdot\|$ . ■

These previous lemmas hence allow to translate functional uniformly convex results into results for classic balls norms. For instance, [Shalev-Shwartz, 2007, Lemma 17] showed that for  $p \in ]1, 2]$   $f(x) = 1/2\|x\|_p^2$  was  $(p - 1)$ -uniformly convex with respect to  $\|\cdot\|_p$ .
